1

2 **How hibernation in frogs drives brain and reproductive evolution in opposite directions**

3

4 Wen Bo Liao<sup>1,2,\*</sup>, Ying Jiang<sup>1,2</sup>, Long Jin<sup>1,2</sup> & Stefan Lüpold<sup>3,\*</sup>

5

6 <sup>1</sup> Key Laboratory of Southwest China Wildlife Resources Conservation (Ministry of Education),  
7 China West Normal University, Nanchong, Sichuan, China

8 <sup>2</sup> Key Laboratory of Artificial Propagation and Utilization in Anurans of Nanchong City, China  
9 West Normal University, Nanchong, Sichuan, China

10 <sup>3</sup> Department of Evolutionary Biology and Environmental Studies, University of Zurich, Zurich,  
11 Switzerland

12 \*Corresponding authors: Wen Bo Liao, Stefan Lüpold

13

14 **Email:** liaobo\_0\_0@126.com (WBL) and stefan.luepold@ieu.uzh.ch (SL)

15 **Author Contributions:** W.B.L. conceptualized the study; W.B.L., Y.J., L.J., C.L.M. and J.P.Y.  
16 collected the data; S.L. analyzed the data; and W.B.L. and S.L. wrote the manuscript.

17 **Competing Interest Statement:** The authors declare that they have no conflict of interest.

18 **Keywords:** Anura | Brain size | Fat storage | Resource allocation | Trade-off | Testis size

19

## 20 **Abstract**

21 Environmental seasonality can promote the evolution of larger brains through cognitive and  
22 behavioral flexibility but also hamper it when temporary food shortage is buffered by stored  
23 energy. Multiple hypotheses linking brain evolution to resource acquisition and allocation have  
24 been proposed, albeit separately for different groups of birds or mammals rather than being  
25 directly compared within any single group. Here, using direct tissue measurements and  
26 experimentally validated brumation ('hibernation') parameters, we integrated these hypotheses  
27 across frogs in the context of varying brumation duration and its environmental correlates. We  
28 show that protracted brumation reduces brain size and instead promotes reproductive  
29 investments, likely in response to brumation-dependent changes in the socio-ecological context  
30 that ultimately affect the operation of sexual selection and evolution of mating systems. Our  
31 results reveal novel insight into the complex processes of brain and reproductive evolution in  
32 organisms whose 'cold-blooded' metabolism is particularly susceptible to environmental  
33 seasonality.

34

## 35 **Introduction**

36 Seasonal fluctuations in climatic conditions and primary productivity can result in temporary food  
37 limitation, imposing energetic constraints on animals. Maintaining a positive energy balance  
38 across seasons, or at least minimizing the negative balance during lean periods, can be  
39 achieved by more constant net energy intake than predicted solely by food abundance (Sol,  
40 2009), or by reduced investments in costly organs (Heldstab et al., 2018). At the center of both  
41 strategies is the size of the brain. On the one hand, a relatively large brain can improve the  
42 cognitive ability and behavioral flexibility (Reader and Laland, 2002; Lefebvre et al., 2004; Sol et  
43 al., 2005; Benson-Amram et al., 2016) to locate more diverse and dispersed food sources to

44 buffer the environmental fluctuations of seasonal habitats ('cognitive buffer hypothesis') (Allman  
45 et al., 1993; Sol, 2009; van Woerden et al., 2012). On the other hand, as the high metabolic  
46 costs of brain tissue (Mink et al., 1981; Aiello and Wheeler, 1995; Lukas and Campbell, 2000)  
47 may not be temporarily reducible (Mink et al., 1981), periodic food scarcity is expected to  
48 constrain brain size evolution ('expensive brain hypothesis') (Isler and van Schaik, 2009).

49 Extreme fluctuations in resource acquisition and total metabolic activity are found in hibernating  
50 species, whose basal metabolic rate may drop by over 90% during hibernation (Ruf and Geiser,  
51 2015). Such a radical reduction in metabolism is likely to limit investments in the maintenance of  
52 brain function and thus the support of a large brain. Indeed, mammals with some period of  
53 hibernation tend to have relatively smaller brains than their non-hibernating counterparts  
54 (Heldstab et al., 2018).

55 In addition to cognitive responses (van Woerden et al., 2010), periods of food scarcity can also  
56 promote the evolution of physiological responses. For example, a longer digestive tract may  
57 permit more efficient resource accumulation during a short active period (Sibly, 1981) and so  
58 could be favored by selection in species with prolonged hibernation. This response could  
59 parallel brain size evolution or result in an evolutionary trade-off between the two organs  
60 ('expensive tissue hypothesis') (Aiello and Wheeler, 1995), similar to predicted trade-offs  
61 between brain size and sexually selected traits ('expensive sexual tissue hypothesis') (Pitnick et  
62 al., 2006) or other costly organs more generally ('energy trade-off hypothesis') (Isler and van  
63 Schaik, 2006). Further, physiological buffering is often accompanied by a seasonal reduction in  
64 the metabolic rate or activity (e.g., hibernation), with energy drawn from stored fat reserves  
65 (Heldstab et al., 2016). Even though hibernation does not preclude benefits of cognitive abilities  
66 (e.g., to efficiently accumulate fat reserves before hibernation), the evolution of a relatively  
67 larger brain could be hampered by seasonally alternating between cognitive benefits during the

68 active period and maintenance costs at no obvious benefit during hibernation. In fact, it has  
69 been proposed that the benefits of maximal fat stores and minimal metabolic expenditure on  
70 somatic maintenance during hibernation, on average, are likely to outweigh those of a large  
71 brain ('fat-brain trade-off hypothesis') (Navarrete et al., 2011; Heldstab et al., 2016). By  
72 comparison, non-hibernators may always gain a positive net benefit of a relatively large brain,  
73 possibly even enhanced if it mitigates resource acquisition when food is seasonally scarce  
74 (Allman et al., 1993; Sol, 2009; van Woerden et al., 2012). If so, the probability of positive  
75 selection on brain size should be higher in the absence of hibernation, providing one  
76 explanation for the relatively smaller brains in hibernating compared to non-hibernating  
77 mammals (Heldstab et al., 2018).

78 Allocating a fixed energy budget to the demands of different organs throughout prolonged  
79 hibernation might also have important reproductive consequences. Particularly for species that  
80 reproduce almost immediately after emerging from hibernation, as in some mammals (Psenner,  
81 1957; Place et al., 2002) and many amphibians (Wells, 1977; Fei and Ye, 2001), the seasonal  
82 recrudescence of their reproductive tissue necessarily occurs before emergence when the  
83 stored resources are most limited (Isler and van Schaik, 2009; Isler, 2011). Reproductive  
84 investments, however, are intimately linked to fitness, such as testis size that may be under  
85 intense selection by sperm competition resulting from female multiple mating (Lüpold et al.,  
86 2020). Female promiscuity itself is prevalent where males are less able to effectively  
87 monopolize their mates (Lüpold et al., 2014), and this would seem particularly likely when the  
88 breeding activity is highly synchronized in dense aggregations (Lüpold et al., 2014, 2017).  
89 Indeed, across anurans (frogs and toads) that are often bound to small water bodies for  
90 reproduction, males invest relatively more in their testes and less in their forelimbs (used in pre-  
91 mating competition) as population density increases (Buzatto et al., 2015; Lüpold et al., 2017). If

92 the breeding activity is more synchronized because of a shortened active period, thus  
93 increasing the risk of either competitive fertilization or simply of sperm depletion by a high  
94 mating rate (Vahed and Parker, 2012), selection for relatively larger testes would be stronger  
95 precisely where the available fat stores need to last longer, with likely consequences for  
96 resource demands and allocation while overwintering. Including reproductive investments and  
97 breeding patterns in studies of allocation trade-offs in response to hibernation and  
98 environmental seasonality would thus seem critical but remains to be done, particularly in the  
99 context of brain evolution.

100 The opposing selection pressures on brain or gonad size (i.e., cognitive or fitness benefits  
101 *versus* metabolic costs), varying degrees of seasonality and diverse strategies of buffering  
102 periodic food scarcity (e.g., cognitive *versus* physiological) between species render  
103 environmental fluctuations an ideal context to study brain size evolution. The different  
104 hypotheses invoked to explain the coevolution of brain size with other organs were each  
105 independently developed for a separate set of mammalian or avian taxa, the two vertebrate  
106 classes with the relatively largest brains (Jerison, 1973). These hypotheses have yet to be  
107 directly tested against one another in a single taxon and ideally in the immediate context of  
108 seasonal activity, considering the extent, rather than the mere presence/absence, of  
109 hibernation. This last point is important to the extent that the classification of 'hibernation' could  
110 range anywhere between one or multiple brief inactive bouts (i.e., minimally different from non-  
111 hibernating species) and spending most months of the year in dormancy, with severe energetic  
112 and life-history constraints despite again simply being classified as hibernating. Further,  
113 understanding the generality of the patterns reported in the large-brained mammals or birds  
114 requires validation in other taxa, ideally with smaller brains and different overall energetic  
115 demands. Such generalization would also permit contextualizing brain evolution in the two

116 largest-brained taxa in terms of the strength of selection on encephalization relative to potential  
117 metabolic constraints.

118 A particularly suitable system is presented in ectothermic ('cold-blooded') species whose  
119 metabolism and activity are tightly linked to their ambient temperature and considerably  
120 hampered outside a species-specific temperature range (Wells, 2007). Hence, temperature  
121 constraints on metabolism and activity patterns potentially set stricter physical boundaries to the  
122 ability to buffer food scarcity through behavioral flexibility than in the endothermic ('warm-  
123 blooded') mammals or birds. Additionally, the different groups of mammals, for which most  
124 hypotheses on brain evolution were proposed, exhibit extremely diverse Bauplans and lifestyles  
125 that could confound overall conclusions. By contrast, anurans are relatively homogeneous in  
126 body size and shape, diet or locomotion (Kardong, 2019), but still markedly divergent in their  
127 relative brain size (Liao et al., 2022) or in reproductive (Lüpold et al., 2017) and other  
128 investments (Wells, 2007) in response to environmental variation. Consequently, any resource  
129 trade-offs around the evolution of brain size could, if they exist, be easier to isolate across  
130 anurans than across mammals.

131 Here, we examine variation in male brain and testis size relative to body fat, limb muscles and  
132 the main visceral organs (see Fig. 1) across the males of 116 anuran species in the context of  
133 the vastly varying 'hibernation' periods and their environmental correlates. Frogs differ from  
134 mammals in their physiology of hibernation, in that the seasonal inactivity is a consequence of  
135 ambient temperatures dropping below the activity range rather than of active metabolic  
136 depression (referred to here as 'brumation' for distinction) (Pinder et al., 1992; Wells, 2007).  
137 Yet, important parallels remain in terms of resource allocation. In both taxa, hibernating animals  
138 spend extended periods depleting fixed, previously accumulated energy stores across  
139 sequential investments, albeit at a reduced metabolic rate (Staples, 2016). By contrast, non-

140 hibernators can at least partially compensate for spent resources as they go, but their higher  
141 metabolic rate requires continued resource acquisition even when food is seasonally scarce  
142 (Heldstab et al., 2016). Such differences between strategies are likely to affect the relative costs  
143 and benefits of different organs, and thus how species optimally allocate resources between  
144 them. Relatively larger traits (e.g., brain) can evolve—possibly at the cost of other traits—if they  
145 confer some net fitness benefits.

146 Brumating anurans drop their heart rate, become sluggish, draw the nictitating membranes  
147 across the eyes for protection, spread their legs for stability, and undergo multiple physiological  
148 changes to protect against freezing or to switch from pulmonary to cutaneous gas exchange or  
149 from aerobic to anaerobic metabolism (Pinder et al., 1992; Fei and Ye, 2001; Wells, 2007;  
150 Tattersall and Ultsch, 2008). Yet, several anuran species are known to regularly move in their  
151 burrows or underwater hibernacula in response to changes in soil temperature or oxygen  
152 concentration (van Gelder et al., 1986; Stinner et al., 1994; Holenweg and Reyer, 2000), or  
153 when disturbed (Tattersall and Ultsch, 2008; Niu et al., 2022). Brumating frogs can also exhibit  
154 higher levels of brain cell renewal than active ones, possibly to avoid brain damage (Cerri et al.,  
155 2009), and it seems plausible that the total investment in such renewal would increase with the  
156 amount of brain tissue. Further, larger brains could also be less tolerant to the often hypoxic  
157 brumation conditions (Pinder et al., 1992; Wells, 2007; Tattersall and Ultsch, 2008) if the  
158 findings from other ectotherms extend to brumating anurans (Sukhum et al., 2016). Overall,  
159 maintaining a relatively larger brain while brumating is likely to come with greater costs that  
160 could constrain brain evolution compared to species that show only brief or no seasonal  
161 inactivity.

162 Instead of the typical indirect proxies or scores (Navarrete et al., 2011; Heldstab et al., 2016,  
163 2018; Luo et al., 2017), we directly quantified seasonal changes in tissue sizes and estimated

164 the brumation duration as the period during which temperatures were continuously below the  
165 species-specific activity threshold. These estimated brumation durations corresponded to the  
166 periods of no frog activity detected in field surveys. Our results provide robust evidence that the  
167 duration of brumation under varying climates modifies how frogs allocate their limited resources.  
168 We then resolve the direct and indirect links between these variables to test the different  
169 hypotheses on brain evolution, which have been independently proposed for different avian and  
170 mammalian taxa, within our single set of anurans. We further integrate variation in breeding  
171 contexts and reproductive evolution in this context of resource allocation. Our broad  
172 comparative approach permits disentangling important evolutionary responses to environmental  
173 seasonality with its far-reaching behavioral and physiological consequences for species during  
174 both their active and inactive periods.

175

## 176 **Results**

177 ***Determinants of brumation duration.*** For a mean ( $\pm$ SD) of  $3.41 \pm 0.95$  males in each of 116  
178 anuran species, we combined experimentally determined thermal activity thresholds with multi-  
179 year temperature fluctuations at their collection sites to estimate the species-specific brumation  
180 periods (details and validation in *Material and Methods*). These periods averaged between  $0.6 \pm$   
181  $0.5$  and  $250.5 \pm 16.7$  days across the five years examined, with high repeatability within species  
182 ( $R = 0.95$  [95%CI: 0.93, 0.96]; Fig. S1; Table S1). Twenty-two species were predicted to  
183 overwinter for  $\leq 9$  days, another three species for 18–27 days, and the remaining 91 species for  
184  $\geq 47$  days, resulting in a rapid shift between 9 and 47 days. Since the ground microclimate may  
185 buffer some of the fluctuations in air temperature and frogs can endure short cold spells without  
186 dormancy, we conservatively considered the 25 species with  $\leq 27$  days below their experimental  
187 temperature threshold as unlikely to show any sustained brumation.



188 In phylogenetic regressions (Freckleton et al. 2002), the brumation period increased with both  
189 latitude and elevation of the study sites, as well as with the variation in temperature ( $r \geq 0.42$ ,  
190  $t_{114} \geq 5.00$ ,  $P < 0.001$ ; Table S2). By contrast, the brumation period was inversely related with  
191 the annual mean temperature and precipitation, and the duration of the dry season ( $r < -0.29$ ,  
192  $t_{114} < -3.24$ ,  $P < 0.002$ ), but not significantly associated with longitude or the variation in  
193 precipitation ( $r < 0.09$ ,  $t_{114} < 0.95$ ,  $P > 0.34$ ; Table S2). Except for the period of the dry season,  
194 all these results were qualitatively identical when focusing only on the 91 species with some  
195 expected brumation period (see above; Table S3). Among these 91 species, those inhabiting  
196 cooler and more seasonal climates entered and emerged from their inactive state at lower  
197 temperatures (Table S4), suggesting an increased cold tolerance to maximize their active  
198 period.

199

200 ***Effect of brumation on individual tissue investments.*** Based on this variation in the periods  
201 of active resource acquisition or metabolizing stored resources, respectively, we explored  
202 potential consequences for resource allocation in the same set of males across the 116 species.  
203 In phylogenetic regressions (Freckleton et al. 2002), neither snout-vent length (SVL) nor body  
204 mass covaried with the duration of brumation or any other environmental variable ( $|r| \leq 0.15$ ,  
205  $|t_{114}| \leq 4.03$ ,  $P \geq 0.11$ ; Table S5), with only a weak, non-statistically significant trend toward  
206 reduced body mass at higher elevation ( $r = -0.18$ ,  $t_{114} = -1.91$ ,  $P = 0.06$ , phylogenetic scaling  
207 parameter  $\lambda = 0.94$  [95%CI: 0.85, 1.00]). The different organs and tissues themselves all  
208 increased with body size, but with different allometric slopes. Whereas the mass of body fat and  
209 of both the forelimb and hindlimb muscles showed a disproportionately steep increase relative  
210 to body size across the same 116 species (all  $\beta \geq 1.10$  [1.03, 1.18]), the allometric slope was  
211 substantially shallower for brain size ( $\beta = 0.49$  [0.44, 0.54]; Table S6; Fig. 1A). All remaining

212 tissues did not deviate from proportionate scaling (i.e., 95%CI including 1.00; Table S6; Fig.  
213 1A). Hence, the evolution of brain size appears to be more constrained than that of other organs  
214 when selection favors larger body size.

215 With these different investments in brain size compared to other expensive tissues, we next  
216 tested if the evolution of brain size is constrained by extended brumation, similar to what has  
217 been suggested for mammals based on the mere presence or absence of any hibernation  
218 (Heldstab et al. 2018). Absolute brain size was independent of the brumation period ( $r = -0.10$ ,  
219  $t_{115} = -1.08$ ,  $P = 0.28$ ,  $\lambda = 0.89$  [0.73, 0.97]), but controlling for SVL as a proxy of body size,  
220 males of species with protracted hibernation had relatively smaller brains, whether quantified  
221 during the breeding season (partial  $r$ ,  $r_p = -0.31$ ,  $t_{113} = -3.50$ ,  $P < 0.001$ ,  $\lambda = 0.35$  [0.00, 0.61];  
222 Fig. 2A, Table S7) or shortly before entering hibernation ( $N = 50$  species means based on  $2.64$   
223  $\pm 0.94$  males each:  $r_p = -0.51$ ,  $t_{47} = -4.03$ ,  $P < 0.001$ ,  $\lambda = 0.00$  [0.00, 0.56]; Table S7). This trend  
224 was not a mere result of changing body size in response to brumation, as the SVL itself was  
225 independent of the hibernation period (see above; Table S5). On average, brumating species  
226 tended to have relatively smaller brains than those that are unlikely to overwinter for an  
227 extended period (Table S8), similar to the study of mammals that used the presence/absence of  
228 hibernation as a predictor (Heldstab et al. 2018). However, the above trend also applied to  
229 those 91 species that we classified as brumating for some period (Table S9), thus providing  
230 stronger evidence for a link between brumation and brain evolution than the coarse binary  
231 classification. This pattern further remained robust when we recalculated the predicted  
232 brumation periods such that frogs were only considered to enter their inactive state at  
233 temperatures that were  $2^\circ\text{C}$  or  $4^\circ\text{C}$  below their experimentally derived thresholds. These two  
234 more conservative thresholds for brumation simulated a potential buffering effect of  
235 underground burrows and other shelters relative to the seasonal variation in air temperatures

236 that was available in meteorological databases (details and validation in *Material and Methods*;  
237 Table S10).

238 Species with a prolonged brumation period further had relatively more body fat ( $r_p \geq 0.25$ ,  $t_{113} \geq$   
239  $2.72$ ,  $P \leq 0.008$ ; Fig. 2B) and, at least in breeding condition, relatively larger testes ( $r_p = 0.36$ ,  
240  $t_{113} = 4.06$ ,  $P < 0.001$ ,  $\lambda = 0.77$  [0.40, 0.90]; Fig. 2C) and relatively smaller hindleg muscles ( $r_p =$   
241  $-0.22$ ,  $t_{113} = -2.37$ ,  $P = 0.02$ ,  $\lambda = 0.22$  [0.00, 0.51]; Tables S7). These patterns were generally  
242 consistent when using the presence/absence of brumation (Table S8), buffered temperature  
243 fluctuations (Tables S10), or excluding the 25 species that are unlikely to overwinter (except for  
244 the non-significant effect on body fat; Table S9). The size of the remaining tissues was  
245 independent of brumation (Tables S7 to S10) and did not change significantly between the two  
246 sampling periods (Fig. 2).

247 Comparisons between pre- and post-brumation males, on average across all species, revealed  
248 a ca. 50% decline in fat tissue and 100% increase in testis size, indicating resource depletion  
249 and testicular recrudescence while brumating, respectively (Fig. 1B). Of the remaining  
250 expensive tissues, only the 95%CI of brain size excluded zero, but this change was small  
251 compared to the two traits above and within the range of the many tissues with no significant  
252 change. Thus, the biological significance of this putative increase in brain size during brumation  
253 is questionable as it could simply be attributable to general differences between the few  
254 individuals per species that were sampled during each period. We will thus refrain from further  
255 interpretation. Among the two tissues with considerable change, the extent of fat depletion  
256 increased significantly with the brumation period ( $r = -0.36$ ,  $t_{48} = -2.68$ ,  $P = 0.01$ ,  $\lambda = 0.00$  [0.00,  
257 0.55]), as did that of testis regrowth ( $r = 0.39$ ,  $t_{48} = 2.89$ ,  $P = 0.006$ ,  $\lambda = 0.82$  [0.16, 0.98]; Fig.  
258 1C).

259 Since the patterns for relative testis size might be a response to a shorter, more synchronized  
260 mating season when brumation is long (Wells 2007), we tested for links between brumation  
261 duration and different breeding parameters. Here, prolonged brumation shortened the breeding  
262 season ( $t_{41} = -4.47$ ,  $P < 0.001$ ,  $\lambda = 0.00$  [0.00, 0.38]; Fig. S2A), with a much stronger effect than  
263 any of the climatic variables (Table S11), particularly when considered jointly (Table S12).  
264 Hence, the effect of these climatic variables may be indirect, mediated by brumation. A shorter  
265 breeding season further increased the probability of dense breeding aggregations (phylogenetic  
266 logistic regression:  $N = 42$ ,  $z = -3.03$ ,  $P = 0.002$ ,  $\alpha = 0.02$ ; Fig. S2B). That brumation might  
267 mediate the effects of climatic variables on breeding aggregations via the duration of the  
268 breeding season was also supported by a phylogenetic confirmatory path analysis (von  
269 Hardenberg and Gonzalez-Voyer 2013; Gonzalez-Voyer and von Hardenberg 2014) (Fig. S3;  
270 Table S13). Finally, when combining these data with previously published data on the density of  
271 breeding populations (Lüpold et al. 2017) ( $N = 8$  species overlapping), this effect was also  
272 supported by a trend toward higher mean population densities in species with a shorter  
273 breeding season ( $r = -0.69$ ,  $t_6 = -2.37$ ,  $P = 0.06$ ,  $\lambda = 0.00$  [0.00, 1.00]), albeit based on a small  
274 sample size (Fig. S2C).

275 To explore possible causal links between these breeding parameters and variation in relative  
276 testis size, we conducted directional tests of trait evolution (Pagel 1994; Revell 2012), which test  
277 if changes in two traits are unilaterally dependent, mutually dependent, or independent (Pagel  
278 1994). Although independent evolution was the best-supported scenario based on the Akaike  
279 Information Criterion (AIC), the model with changes in relative testis size dependent on those in  
280 the breeding season was not significantly different ( $\Delta AIC = 0.83$ ,  $w_{AIC} = 0.33$  compared to  
281 independent model with  $w_{AIC} = 0.50$ ) and suggested that testis size was most likely to increase  
282 in response to a shortened breeding season (Fig. S4A). A model predicting increases in relative

283 testis size in response to aggregation formation pointed in a similar direction (Fig. S4B), albeit  
284 not below a  $\Delta AIC$  cut-off of 2 ( $\Delta AIC = 2.38$ ,  $w_{AIC} = 0.20$  compared to independent model with  
285  $w_{AIC} = 0.66$ ). Hence, it is at least possible that breeding conditions could mediate the positive  
286 relationship between the brumation period and relative testis size in our relatively small sample  
287 of species.

288

289 ***Covariation between different tissues.*** Since all tissues depend on the same finite resources,  
290 their evolution in response to brumation is unlikely to be independent. In pairwise partial  
291 correlations controlling for SVL and phylogeny, all tissue masses covaried either positively or  
292 were not significantly associated with one another (Fig. S5). As such, our data do not support  
293 the expensive tissue (Aiello and Wheeler 1995) or the more general energy trade-off  
294 hypotheses (Isler and van Schaik 2006), which predict trade-offs of brain size with the size of  
295 the digestive tract or other costly organs, respectively. However, considering that brain size  
296 differed from fat tissue, hindlimb muscles and testes in the direction of allometric relationships or  
297 their responses to brumation duration, respectively, pairwise correlations may not reveal more  
298 complex allocation patterns. To examine the relative investments in these four most informative  
299 tissues simultaneously, we partitioned the total body mass into the proportional representation  
300 of each of these tissues (and the remaining mass combined as a control) to generate a five-  
301 variable compositional dataset (van den Boogaart and Tolosana-Delgado 2013). The combined  
302 mass of all four focal tissues scaled proportionately with body size (allometric  $\beta = 1.02$  [0.96,  
303 1.07],  $\lambda = 0.01$  [0.00, 0.11]), confirming that each species allocated a size-independent share of  
304 its total resources to the four focal tissues combined. How these investments were distributed  
305 across these tissues, however, varied considerably between species. In pairwise correlations  
306 between the four focal tissues, transformed to centered log ratios (van den Boogaart and

307 Tolosana-Delgado 2008) and controlling for phylogeny, brain mass covaried negatively with  
308 both body fat and testis mass, whilst testis mass was negatively correlated with hindlimb muscle  
309 mass but not associated with body fat (Fig. 3A-D; Table S14). To further examine the effect of  
310 brumation duration on all five variables simultaneously, we conducted a phylogenetic  
311 multivariate regression analysis (Clavel et al. 2015) on the same compositional data, but now  
312 transformed to isometric log ratios as recommended for multivariate models (van den Boogaart  
313 and Tolosana-Delgado 2008, 2013). Brumation duration had a significant effect on the body  
314 composition of frogs (Pillai's trace = 0.33, effect size  $\xi^2 = 0.30$ ,  $P = 0.001$ ). The back-  
315 transformed coefficients of body fat (0.23) and testis mass (0.26) were greater, and those of  
316 brain mass, hindlimb muscles and the rest of the body were lower (0.16, 0.17, and 0.18,  
317 respectively), than the expected coefficient of 0.20 for all five variables if increasing brumation  
318 duration were to cause no compositional change (also see Fig. 3).

319 We further confirmed the negative associations of brain size with both body fat and testis mass,  
320 and that between testis mass and hindlimb muscles, in a phylogenetically informed principal  
321 component analysis (Revell 2012) (Fig. 3E,F, Table S15). Here, the first three principal  
322 components (PC1 to PC3) explained 84.7%, 8.0% and 5.1% of the total variance, respectively.  
323 Even though both PC2 and PC3 explained a relatively small proportion of the total variance,  
324 they separated the different tissues. PC2 was predominantly loaded by brain size (0.30) and  
325 testis mass (-0.44), and PC3 by brain size (0.26) and body fat (-0.31). Both cases thus  
326 indicated a negative association between the pairs of traits within the multivariate trait space  
327 (Fig. 3F). Further, brumation duration covaried negatively with PC2 ( $r = -0.53$ ,  $t_{114} = -6.59$ ,  $P <$   
328  $0.0001$ ,  $\lambda = 0.74$  [0.49, 0.92]), consistent with a decrease in brain size and increase in testis  
329 mass towards longer brumation, but it was not significantly associated with PC3 ( $r = -0.12$ ,  $t_{114}$   
330  $= -1.30$ ,  $P = 0.20$ ,  $\lambda = 0.41$  [0.00, 0.70]).

331

332 ***Direct and indirect effects revealed by path analysis.*** To disentangle the evolutionary links  
333 between the relative sizes of costly tissues, and to test the most prominent hypotheses of brain  
334 evolution simultaneously in the direct context of brumation, we finally integrated these patterns  
335 in a phylogenetic confirmatory path analysis (von Hardenberg and Gonzalez-Voyer 2013;  
336 Gonzalez-Voyer and von Hardenberg 2014) based on 28 pre-specified candidate path models  
337 (Fig. S6; Table S16). The averaged model (Fig. 4) confirmed the negative effect of prolonged  
338 brumation on relative brain size ( $\beta = -0.15 [-0.22, -0.07]$ ), which paralleled direct ( $\beta = 0.16$   
339  $[0.07, 0.26]$ ) and indirect positive effects on relative testis size (Fig. S7). These indirect effects  
340 on testis evolution were mediated by the relative amount of adipose tissue, which increased with  
341 both the brumation period ( $\beta = 0.13 [0.06, 0.20]$ ) and the relative size of the digestive tract ( $\beta =$   
342  $0.51 [0.37, 0.65]$ ), and in turn had a positive effect on relative testis size ( $\beta = 0.39 [0.18, 0.59]$ ).

343

## 344 **Discussion**

345 Our experimentally validated brumation periods and direct measures of the relative sizes of, and  
346 changes in, expensive tissues revealed novel insight into the complex and non-independent  
347 processes of brain and reproductive evolution in anurans whose ‘cold-blooded’ metabolism is  
348 particularly susceptible to environmental seasonality. Species in highly seasonal environments,  
349 which go through prolonged inactive periods, had relatively smaller brains than those in more  
350 stable climates. By reducing the brain tissue and its associated maintenance costs, brumating  
351 species redirected their additional fat reserves to reproduction, possibly due to the shorter  
352 breeding season with its socio-ecological consequences.

353 We demonstrated that anurans inhabiting cooler and more seasonal climates entered and  
354 emerged from their inactive state at lower temperatures, indicating increased cold tolerance to

355 maximize their active period. Yet, with the metabolic rate depending on its thermal environment  
356 in ectotherms, low temperatures might render foraging and digestion too inefficient to extend  
357 activity beyond certain thresholds (e.g., Riddle, 1909; Fontaine et al., 2018). In response to the  
358 varying periods of a positive *versus* negative net energy balance, we found that species with  
359 protracted brumation have relatively smaller brains. These results confirm that, unlike birds (Sol,  
360 2009) and some mammals (van Woerden et al., 2010), challenging and unpredictable  
361 environmental conditions select for physiological rather than cognitive buffering in anurans (Luo  
362 et al., 2017). Supporting a relatively large brain may not be sustainable in the absence of  
363 continued resource intake, or large brains could be less tolerant to hypoxic conditions (Sukhum  
364 et al., 2016) during brumation. However, selection for relatively larger brains may also simply be  
365 stronger in species with a long active (and so short brumation) period owing to extended  
366 cognitive benefits such as predator evasion (Kotrschal et al., 2015) or exploitation of better and  
367 more diverse food sources (Lefebvre et al., 1997; Jiang et al., 2022).

368 In pairwise comparisons, the relative sizes of the tissues examined here, including the brain,  
369 were generally positively correlated. These results reject both the expensive tissue (Aiello and  
370 Wheeler, 1995) and the more general energy trade-off hypotheses (Isler and van Schaik, 2006),  
371 which predict trade-offs of brain size with the size of the digestive tract or other costly organs,  
372 respectively. This lack of support in anurans aligns with a previous report in mammals  
373 (Navarrete et al., 2011) despite their substantially smaller brains and vastly different ecology  
374 and physiology, including a lower metabolic rate and largely lacking physiological  
375 thermoregulation. When focusing jointly on the four tissues (brain, body fat, testes, hindlimb  
376 muscles) that covaried with brumation duration, however, relative brain size covaried negatively  
377 with the relative mass of both the fat tissue and testes as predicted by the fat–brain trade-off  
378 (Navarrete et al., 2011) or expensive sexual tissue hypotheses (Pitnick et al., 2006),



379 respectively. Species with an extended brumation period exhibited both a relatively larger  
380 amount of body fat in total and a higher degree of its depletion, providing direct evidence to the  
381 hypothesis that anurans buffer lean periods by metabolizing stored fat (Luo et al. 2017; Huang  
382 et al., 2020). Although adipose tissue may not itself be metabolically expensive, transporting it  
383 adds costs to locomotion, particularly when jumping away from predators (Moreno-Rueda et al.,  
384 2020) or climbing trees compared to moving horizontally on land or in water (Alexander, 2003;  
385 Hanna et al., 2008). Consistent with this notion, arboreal species tended to be leaner compared  
386 to (semi)aquatic or terrestrial species (Table S17), controlling for brumation duration and relative  
387 brain size, both of which we had shown to covary with body fat (Figs. 2 and 3).

388 In addition to a relatively smaller brain and relatively larger fat reserves, species with a  
389 prolonged brumation period also had relatively smaller hindleg muscles and larger testes. Since  
390 anurans move primarily using their hindlegs, the negative relationship between hindleg muscle  
391 mass and brumation duration may be linked to more movement during a longer active period,  
392 including predator evasion (Marchisin and Anderson, 1978; Liao et al., 2022). Further, one  
393 explanation for the negative association between brumation and relatively testis size could be  
394 that a shortened active period compacts the breeding season, resulting in denser and more  
395 aggregated breeding populations and likely more synchronous mating activity (Wells, 2007), as  
396 indicated by our path analysis. These aggregations heighten the likelihood that multiple males  
397 attempt to mount the same female simultaneously (Lüpold et al., 2017 p. 20), resulting in more  
398 intense male-male competition over fertilization and thus enhanced investments in sperm  
399 production (Liao et al., 2018; Lüpold et al., 2020). Our results thus reveal how the environmental  
400 variation and physical constraints that determine the species-specific brumation pattern might  
401 play a pivotal, albeit previously overlooked, role in shaping the socio-ecological context of

402 breeding, the mode and degree of sexual selection, and ultimately the evolution of mating  
403 systems, broadening Emlen & Oring's (Emlen and Oring, 1977) general predictions.

404 Species with protracted brumation not only exhibited relative larger testes, but also a greater  
405 change in testis size from pre- to post-brumation (i.e., breeding) condition. The testes of  
406 seasonally breeding anurans regress after the mating season and regrow before the next  
407 (Ogielska and Bartmańska, 2009). Whereas non-brumating species can compensate for the  
408 resources invested in testicular recrudescence by energy uptake, those with a short breeding  
409 season following a prolonged inactive period depend on the stored fat to regrow their testes  
410 before or immediately after emergence from their hibernaculum. Hence, resources are diverted  
411 away from the brain and other organs, which may be the case especially in species such as  
412 *Brachytarsophrys* spp., in which the fully developed testes combined weigh 12–14 times more  
413 than the brain (Data S1).

414 To integrate all these different patterns and test the most prominent hypotheses of brain  
415 evolution simultaneously in the direct context of brumation, we also performed a phylogenetic  
416 path analysis. This analysis corroborated the negative effect of brumation duration on relative  
417 brain size and revealed both its direct and indirect positive effects on relative testis size. The  
418 indirect effects on testis evolution were mediated by the amount of adipose tissue, which itself  
419 responded to variation in the inactive period (energetic demand) and the size of the digestive  
420 tract (energy uptake). That variation in body fat did not contribute to brain size evolution in this  
421 more comprehensive analysis compared to pairwise correlations suggests that the fat–brain  
422 trade-off may not be a direct one. Rather, prolonged brumation, and thus short active period,  
423 may enhance selection on fat storage for testicular investments in addition to starvation  
424 avoidance, while simultaneously selecting for smaller brains (or weakening selection for larger

425 brains) due to a shifted balance between the cognition-derived fitness benefits and the energetic  
426 costs related to brain size (Fig. 3).

427 A trade-off between brain and testis sizes has been reported for bats (Pitnick et al., 2006), albeit  
428 unsupported by a later study (Dechmann and Safi, 2009) or in other mammalian groups  
429 (Lemaître et al., 2009). In anurans, the apparent brain–testes trade-off may not be a direct  
430 functional one but result indirectly from opposing selection on brain and testis sizes via  
431 environmental seasonality and relative durations of the active and inactive periods. The testes  
432 may primarily evolve in response to the heightened levels of sperm competition and sperm  
433 depletion during the shortened and more synchronized breeding season. The brain, while also  
434 responding to sexual selection (Mai et al., 2020), is central to various activities other than  
435 mating, including feeding (Lefebvre et al., 1997) or predator avoidance (Kotrschal et al., 2015;  
436 Liao et al., 2022) that are themselves subject to climatic conditions and may independently  
437 influence brain evolution. In addition, whereas testes can regress to save energy when inactive  
438 (Ogielska and Bartmańska, 2009), brain metabolism may be less reducible (Mink et al., 1981),  
439 resulting in a different balance between fitness costs and benefits between these organs in  
440 relation to seasonality.

441 In conclusion, our analyses resolve how brumation in anurans, resulting from high  
442 environmental seasonality, may constrain the evolution of brain size and affect, directly or  
443 through its environmental correlates, resource allocation between costly tissues. These results  
444 reveal novel insight into the complex context of brain size evolution in far smaller-brained  
445 organisms than those typically studied, and whose ‘cold-blooded’ metabolism is particularly  
446 susceptible to environmental fluctuations. Our data also draw attention to the impact that  
447 varying brumation periods are likely to have on the operation of sexual selection and mating  
448 system evolution by modifying the timing and socio-ecological context of breeding during the

449 active period. In turn, these factors determine reproductive investments and, via differential  
450 resource allocation, may also affect brain evolution. These non-independent selective  
451 processes promoting diversification in different traits highlight the need to study the evolutionary  
452 trajectory of a given trait such as brain size in the immediate context of both simultaneous  
453 investments to other tissues and the species-specific ecology.

454

## 455 **Materials and Methods**

456 ***Sample collection and preparation.*** Between 2010 and 2020 and as part of concurrent  
457 studies, we collected a total of 396 sexually mature males from 116 anuran species ( $3.41 \pm 0.95$   
458 males each) in post-brumation breeding condition and an additional 132 adult males from 50 of  
459 these species ( $2.64 \pm 0.94$  males each) shortly before entering their hibernacula (Data S1 and  
460 S2). For each species, we sampled all males at a single location in southern and western China  
461 with known longitude, latitude, and elevation (Data S3). Upon transfer to the laboratory, we  
462 sacrificed the individuals by single-pithing, measured their snout-vent length (SVL) to the  
463 nearest 0.01 mm with calipers and then preserved them in 4% phosphate-buffered formalin for  
464 tissue fixation.

465 After two months of preservation, we weighed each complete specimen to the nearest 0.1 mg  
466 using an electronic balance to obtain body mass before dissecting them following a strict  
467 protocol. We separately extracted the brain, heart, liver, lungs, kidneys, spleen, digestive tract,  
468 testes, limb muscles, and fat stores, cleaned these tissues and immediately weighed them to  
469 the nearest 0.1 mg with an electronic balance. We additionally measured the length of the  
470 digestive tract to the nearest 0.01 mm using calipers. We excluded emaciated individuals or  
471 those exhibiting visible organ pathologies from our analyses.

472

473 **Environmental seasonality.** For each collection site, we retrieved from the 30-year climate  
474 history of <https://www.meteoblue.com> the monthly mean temperature (in °C) and total  
475 precipitation (in mm) (Data S3) and used these values to calculate location-specific annual  
476 means and coefficients of variation. We also determined the duration of the dry season, P2T, as  
477 the number of months, for which the total precipitation was less than twice the mean  
478 temperature (Walter, 1971).

479

480 **Brumation period.** One way that anurans can physiologically respond to seasonality is by  
481 adjusting their thermal sensitivity and thus brumation period (Wells, 2007), which in turn could  
482 directly or indirectly affect the evolution of brain size (Heldstab et al. 2018). Hence, we  
483 estimated the brumation period for all 116 species. To this end, we visited the field sites for 30  
484 of our species daily around the expected start and end times of brumation (based on prior  
485 experience). For each species, we recorded the dates and temperatures (using a Kobold HND-  
486 T105 high-precision thermometer to the nearest 0.1°C) when the last frogs of a given species  
487 were seen at the end of their active period (with no further activity detected for at least seven  
488 days) and when the first individuals were detected in the spring. For the same 30 species (and  
489 using the same individuals as for morphological measurements), we then experimentally  
490 simulated brumation using a Q18 temperature-controlled refrigerator in Shenzhen Pioneer  
491 (SAST). We gradually lowered and raised the temperature at a rate of 0.5°C/hour and recorded  
492 the temperature at which test subjects entered and left the typical brumation posture (i.e.,  
493 motion-less four-point stance with the nictitating membranes drawn across the eyes). These  
494 threshold temperatures were tightly associated with the corresponding field measurements both  
495 for the start ( $r = 0.97$ ,  $t_{28} = 22.26$ ,  $P < 0.0001$ ,  $\lambda = 0.04$  [0.00, 0.47]) and end of the inactive state

496 ( $r = 0.98$ ,  $t_{28} = 28.05$ ,  $P < 0.0001$ ,  $\lambda = 0.04$  [0.00, 0.43]). Hence, we assessed the corresponding  
497 temperatures for all remaining species in the laboratory and estimated the brumation period  
498 based on the daily mean temperatures at the corresponding collection sites as retrieved from  
499 Chinese Meteorological Stations (<http://www.lishi.tianqi.com>) between 2012 and 2016. We  
500 defined the brumation period as the number of consecutive days in each year that remained  
501 below this threshold. For simplicity we determined the active rather than brumation period,  
502 starting with the first day that the mean daily temperature rose above the activity threshold and  
503 remained there for at least five consecutive days, and ending with the last day before the  
504 temperature dropped below the activity threshold and remained there until the end of the  
505 calendar year. The brumation period then represented the difference between the activity period  
506 and the total number of days in each calendar year. Across these five years, the measured  
507 temperature thresholds yielded highly repeatable species-specific estimates of the number of  
508 days below the activity range ( $R = 0.95$  [95%CI: 0.93–0.96]), as determined by the *rpt* function  
509 in the *rptR* package (Stoffel et al. 2017) across all 116 species (Fig. S1; Table S1). Further,  
510 across the 30 species that were examined both in the lab and the field (see above), these  
511 predicted brumation periods were also correlated with the observed brumation periods in the  
512 field ( $r = 0.96$ ,  $t_{28} = 18.03$ ,  $P < 0.0001$ ,  $\lambda = 0.05$  [0.00, 0.48]; Fig. S8A), which themselves were  
513 highly repeatable between years within species ( $R = 0.98$  [0.96–0.99]; Table S1).

514 Based on this data validation, we used for each species the mean brumation period predicted  
515 from our experimentally simulated temperature thresholds. However, to test for potential  
516 buffering effects of burrowing in the soil relative to the air temperatures reported by the  
517 meteorological stations, we also repeated these estimates by using more conservative thermal  
518 thresholds. Here, we restricted the putative brumation days to those with a reported air  
519 temperature of either 2°C or 4°C below the experimentally derived inactivity thresholds,

520 simulating prolonged activity by seeking shelter in burrows. The 2°C threshold was based on a  
521 pilot study comparing direct measurements of air and burrow temperatures for four different  
522 burrows in each of five of our study species (burrow depths:  $32.0 \pm 3.2$  to  $121.0 \pm 17.8$  cm; Fig.  
523 S9). Across these species, the burrow-to-air temperature difference reached  $1.03 \pm 0.35^\circ\text{C}$  to  
524  $2.45 \pm 0.60^\circ\text{C}$  in measurements around the peak of the brumation period (i.e., early January;  
525 Fig. S9). However, since these temporal snapshots were based on sites at relatively low  
526 elevation ( $\leq 320$  m a.s.l.) due to accessibility of burrows during winter, we also used a second,  
527 more conservative buffer (4°C below activity range) for comparison. These temperature buffers  
528 shortened the predicted brumation periods to a varying degree between species (Fig. S8B); yet  
529 the predicted periods covaried strongly between the different temperature thresholds (all  $r >$   
530  $0.90$ ,  $t_{14} > 21.96$ ,  $P < 0.0001$ , all  $\lambda < 0.01$ ).

531

532 **Phylogeny reconstruction.** To reconstruct the phylogeny, we obtained the sequences of three  
533 nuclear and six mitochondrial genes from GenBank (for accession numbers and sequence  
534 coverage see Data S4). The three nuclear genes included the recombination-activating gene 1  
535 (RAG1), rhodopsin (RHOD) and tyrosinase (TYR). The six mitochondrial genes were  
536 cytochrome *b* (CYTB), cytochrome oxidase subunit I (COI), NADH dehydrogenase subunits 2  
537 and 4 (ND2 and ND4), and the large and small subunits of the mitochondrial ribosome genes  
538 (12S/16S; omitting the adjacent tRNAs as they were difficult to align and represented only a  
539 small amount of data). We aligned the sequences by multi-sequence alignment (MUSCLE) in  
540 MEGA v.10.2.2 (Tamura et al., 2013) before comparing possible nucleotide substitution models.  
541 The best substitution model, as determined by the function *modelTest()* in the R (R Core Team,  
542 2022) package *phangorn* (Schliep, 2011) based on the corrected Akaike Information Criterion,  
543 AICc, was GTR+ $\Gamma$ +I for all genes except RHOD, for which HKY+ $\Gamma$  had stronger support.

544 Using BEAUTi and BEAST v.1.10.4 (Suchard et al., 2018), we then constructed the phylogeny  
545 with unlinked substitution models, a relaxed uncorrelated log-normal clock, a Yule speciation  
546 process, and the best-supported nucleotide substitution models. We omitted time calibration  
547 due to a lack of fossil dates. We ran the Markov Chain Monte Carlo (MCMC) simulation for 55  
548 million generations while sampling every 5,000<sup>th</sup> tree with a 10% burn-in. Most effective sample  
549 size (ESS) values by far exceeded 375 (i.e. all well above the recommended threshold of 200)  
550 for all but two tree statistics in the program Tracer v.1.7.2 (Rambaut et al., 2018), thus indicating  
551 satisfying convergence of the Bayesian chain and adequate model mixing. Finally, we  
552 generated a maximum clade credibility tree with mean node heights and a 10% burn-in using  
553 TreeAnnotator v.1.10.4 (Suchard et al., 2018), presented in Fig. S10.

554

555 ***Breeding conditions.*** To test if a prolonged brumation period reduces the time available for  
556 reproduction, thereby changing the level of competition over mates and fertilizations (Lüpold et  
557 al., 2017), we extracted the start and end dates of the breeding season from our field notes of  
558 concurrent studies on species-specific life histories. These data were available for 43 of our  
559 species (Data S3). We used recorded dates when the first and last clutches were observed in  
560 focal ponds as a proxy of mating activity, given that males release their sperm during oviposition  
561 in these external fertilizers. For each species, dates from at least two years were combined and  
562 averaged to obtain the mean duration of the breeding season.

563 We further recorded whether dense mating aggregations are typically observed in these  
564 species. We have previously shown that larger mating clusters, with multiple males clasping the  
565 same females, have a significant effect on the evolution of testis size due to the resulting  
566 competition among sperm for fertilization (Lüpold et al., 2017). Here, we had no detailed data on



567 the sizes of aggregations and so were only able to code the typical presence or absence of  
568 aggregations as a binary variable (Data S3).

569 Finally, we used our direct estimates of species-specific population densities from our previous  
570 study (Lüpold et al., 2017) to test whether a shorter breeding season results in denser breeding  
571 populations. Although population density is a more direct measure than the occurrence of  
572 aggregations, such data were available for only eight of our species, each based on multiple  
573 populations per species (Lüpold et al., 2017). All these data were not necessarily derived from  
574 the same years or populations of our main dataset, but given the within-species repeatability in  
575 breeding populations (Lüpold et al., 2017) and in the duration of the breeding season ( $R = 0.88$   
576 [0.79–0.93]; Table S1), these differences should be relatively small compared to the  
577 interspecific variation and mostly introduce random noise.

578

579 **Data analyses.** We conducted all statistical analyses in R v.4.2.0 (R Core Team, 2022), using  
580 log-transformed data for all phenotypic traits, and for the CV in temperature among the  
581 ecological variables. To account for non-independence of data due to common ancestry (Pagel,  
582 1999; Freckleton et al., 2002), we conducted phylogenetic generalized least-squares (PGLS) or  
583 phylogenetic logistic regressions (e.g., for occurrence of breeding aggregations), using the R  
584 package *phylolm* (Ho and Ané, 2014) and our reconstructed phylogeny. To account for variation  
585 around the species means, we bootstrapped for each model (at 100 fitted replicates) the  
586 standardized regression coefficients along with the phylogenetic scaling parameter  $\lambda$  and  
587 calculated their corresponding 95% confidence intervals. The  $\lambda$  values indicate phylogenetic  
588 independence near zero and strong phylogenetic dependence near one (Freckleton et al.,  
589 2002).

590 Unless stated otherwise, all PGLS models focusing on the relative mass of tissues as the  
591 response included snout-vent length (SVL) as a covariate in addition to the focal predictor  
592 variable(s). We chose SVL instead of body mass because it is the commonly used measure of  
593 body size in anurans and independent of seasonal fluctuations in tissues such as body fat,  
594 testes, or limb muscles. One exception, however, was the analysis of phylogenetically informed  
595 allometric relationships, for which we cubed SVL such that a slope of 1 equaled unity (isometry).  
596 For these allometric relationships we calculated ordinary (generalized) least-squares rather than  
597 reduced major-axis regressions, because their greater sensitivity to changes in the steepness,  
598 but lower sensitivity to changes in scatter, capture allometric slopes more adequately (Kilmer  
599 and Rodríguez, 2017).

600 To examine the covariation between different tissues across species, we first calculated  
601 pairwise partial correlations controlling for SVL and phylogeny. To this end, we calculated the  
602 phylogenetic trait variance-covariance matrix between the pairs of focal variable and SVL using  
603 the function *phyl.vcv()* in *phytools* (Revell, 2012) with  $\lambda = 1$  (i.e. Brownian motion), which we  
604 then scaled into a correlation matrix using *cov2cor()* in the *stats* package (R Core Team, 2022).  
605 Using the resulting correlation coefficients  $r_{xy}$ ,  $r_{xz}$ , and  $r_{yz}$ , respectively, we then calculated the  
606 partial correlation coefficient  $r_{xy.z}$  between the  $x$  and  $y$  variables of interest while accounting for  
607 SVL ( $z$ ) following Crawley's (Crawley 2007) equation:  $r_{xy.z} = \frac{r_{xy} - r_{xz}r_{yz}}{\sqrt{(1-r_{xz}^2)(1-r_{yz}^2)}}$ , with the associated  
608  $t$ -statistics and 95% confidence intervals converted using standard conversion ( $t = r \sqrt{\frac{df}{1-r^2}}$ ) and  
609 the package *effectsize* (Ben-Shachar et al., 2020), respectively.

610 Since pairwise correlations do not necessarily capture more complex, multivariate allocation  
611 patterns, we used two additional approaches to explore how tissue sizes varied relative to  
612 others. Here, we focused on those four tissues that covaried with brumation duration or deviated

613 from proportionate scaling with body size: brain, body fat, testes, and hindlimb muscles. Using  
614 the function *acomp()* in the R package *compositions* (van den Boogaart and Tolosana-Delgado  
615 2008), we partitioned total body mass of each species into a five-variable Aitchison composition  
616 in a logistic geometry (van den Boogaart and Tolosana-Delgado, 2013), consisting of the  
617 proportional representation of the four focal tissues and the combined remaining body mass.  
618 Since the focal tissues constituted a size-independent fraction of the total body, the closed  
619 composition of this combined mass should be unbiased relative to body size but can instead  
620 reveal differential contributions of these tissues to their total in a multivariate context (Aitchison,  
621 1982; Muldowney et al., 2001; van den Boogaart and Tolosana-Delgado, 2013). For  
622 phylogenetic correlations between these variables following the description above, we used  
623 centered log ratios obtained by the function *clr()* in the same package, which maintains the  
624 original variable structure. However, owing to the reliance on a full rank of the covariance in  
625 multivariate analyses, we used the *ilr()* function to project the  $D$ -part composition isometrically to  
626 a  $D-1$  dimensional simplex (Aitchison, 1982), essentially representing the log ratios between  
627 the  $D$  parts. This multivariate object we subjected to a phylogenetic multivariate regression  
628 against brumation duration using the functions *mvglS()* and *manova.gls()* in the package  
629 *mvMORPH* (Clavel et al., 2015). For interpretation in the context of the original variable space,  
630 we back-transformed the coefficients using the *ilrInv()* function in *compositions*. In addition to  
631 this compositional data analysis, we also performed a phylogenetically informed principal  
632 component analysis on the same focal tissues as log-transformed species means, using the  
633 *phyl.pca()* function of the package *phytools* (Revell, 2012). Here, we primarily focused on the  
634 directions of the loading vectors relative to the principal components and one another to glean  
635 information on the correlations between the original variables in the principal component space.

636 Finally, we performed phylogenetic confirmatory path analyses (von Hardenberg and Gonzalez-  
637 Voyer 2013; Gonzalez-Voyer and von Hardenberg, 2014) based on pre-specified candidate  
638 structural equation models, either to explore the direct and indirect effects of climatic variables  
639 on the duration of the breeding season or formation of breeding aggregations, or to better  
640 disentangle the different interrelationships between traits that could ultimately mediate the effect  
641 of brumation duration on brain and reproductive evolution. Using the R package *phylopath* (van  
642 der Bijl 2018), we examined the conditional independencies of each model, ranked all candidate  
643 models based on their C-statistic Information Criterion (CICc), and then averaged those with  
644  $\Delta\text{CICc} \leq 2$  from the top model (von Hardenberg and Gonzalez-Voyer, 2013). To avoid  
645 overparameterization of the path analysis on breeding parameters, which was based on only 43  
646 species, we did not include testis mass (and so necessarily also SVL to control for body size) as  
647 additional variables in the same path models. However, we separately tested for correlated  
648 evolution using directional tests of trait evolution (Pagel, 1994; Revell, 2012). Based on (the  
649 weight of) the Akaike Information Criterion (AIC), we tested if changes in relative testis size and  
650 breeding parameters, respectively, were unilaterally dependent, mutually dependent, or  
651 independent (Pagel, 1994), using the *fitPagel()* function in the *phytools* package (Revell, 2012)  
652 with “fitDiscrete” as the optimization method and allowing all rates to differ (i.e., “ARD” model).  
653 Since these analyses are based on evolutionary transitions between binary states, we  
654 considered positive residuals of a log-log regression between testis mass and SVL as ‘relatively  
655 large testes’ and negative residuals as ‘relatively small testes.’ For the duration of the breeding  
656 season, we similarly split the distribution based on the mean duration, whereas aggregation  
657 formation was already coded as present or absent.

658

## 659 **Acknowledgments**

660 We thank K. Isler and C. van Schaik for helpful comments on an earlier draft of our manuscript,  
661 and J. Santin for insightful discussions. Financial support was provided by the National Natural  
662 Sciences Foundation of China (31970393 to WBL) and by the Swiss National Science  
663 Foundation (PP00P3\_170669 and PP00P3\_202662 to SL).

664

#### 665 **Data and code availability**

666 All data and R scripts related to this article are deposited in the Figshare Data Repository (doi:  
667 10.6084/m9.figshare.21078052).

668

#### 669 **Ethics statement**

670 The specimens used in this study were collected with permission from the China West Normal  
671 University Ethical Committee for Animal Experiments (CWNU-202001), and the experimental  
672 protocols adhered to the current laws of China concerning animal experimentation.

673

#### 674 **References**

675 Aiello LC, Wheeler P. 1995. The expensive-tissue hypothesis: the brain and the digestive  
676 system in human and primate evolution. *Current Anthropology* 36:199–221.

677 Aitchison J. 1982. The statistical analysis of compositional data. *Journal of The Royal Statistical  
678 Society Series B-statistical Methodology* 44:139–177.

679 Alexander RM. 2003. *Principles of Animal Locomotion*. Princeton University Press, Princeton,  
680 NJ.

681 Allman J, McLaughlin T, Hakeem A. 1993. Brain weight and life-span in primate species.

682 *Proceedings of the National Academy of Sciences of the United States of America*  
683 90:118–122.

- 684 Ben-Shachar MS, Lüdtke D, Makowski D. 2020. effectsize: Estimation of effect size indices  
685 and standardized parameters. *Journal of Open Source Software* 5:2815.
- 686 Benson-Amram, S., B. Dantzer, G. Stricker, E. M. Swanson, and K. E. Holekamp. 2016. Brain  
687 size predicts problem-solving ability in mammalian carnivores. *Proceedings of the*  
688 *National Academy of Sciences of the United States of America* 113:2532–2537.
- 689 Buzatto BA, Roberts JD, Simmons LW. 2015. Sperm competition and the evolution of  
690 precopulatory weapons: Increasing male density promotes sperm competition and  
691 reduces selection on arm strength in a chorusing frog. *Evolution* 69:2613–2624.
- 692 Cerri S, Bottiroli G, Bottone MG, Barni S, Bernocchi G. 2009. Cell proliferation and death in the  
693 brain of active and hibernating frogs. *Journal of Anatomy* 215:124–131.
- 694 Clavel, J., G. Escarguel, and G. Merceron. 2015. mvMORPH: an R package for fitting  
695 multivariate evolutionary models to morphometric data. *Methods Ecology and Evolution*  
696 6:1311–1319.
- 697 Crawley MJ. 2007. *The R Book*. John Wiley & Sons Ltd, West Sussex.
- 698 Dechmann D K N, Safi K. 2009. Comparative studies of brain evolution: a critical insight from  
699 the Chiroptera. *Biological Reviews* 84:161–172.
- 700 Emlen ST, Oring L W. 1977. Ecology, sexual selection, and evolution of mating systems.  
701 *Science* 197:215–223.
- 702 Fei L, Ye CY. 2001. *The Colour Handbook of the Amphibians of Sichuan*. China Forestry  
703 Publishing House, Chengdu.
- 704 Fontaine S S, Novarro A J, Kohl K D. 2018. Environmental temperature alters the digestive  
705 performance and gut microbiota of a terrestrial amphibian.  
706 *Journal of Experimental Biology* 221:jeb187559.
- 707 Freckleton R P, Harvey P H, Pagel M. 2002. Phylogenetic analysis and comparative data: a test  
708 and review of evidence. *American Naturalist* 160:712–726.

- 709 Gonzalez-Voyer A, von Hardenberg A. 2014. An introduction to phylogenetic path analysis. Pp.  
710 201–229 in L Z Garamszegi, ed. Modern Phylogenetic Comparative Methods and their  
711 Application in Evolutionary Biology. Springer-Verlag, Berlin.
- 712 Hanna J B, Schmitt D, and Griffin T M. 2008. The energetic cost of climbing in primates.  
713 Science 320:898–898.
- 714 Heldstab S A, Isler K, van Schaik C P. 2018. Hibernation constrains brain size evolution in  
715 mammals. Journal of Evolutionary Biology 31:1582–1588.
- 716 Heldstab S A, van Schaik C P, Isler K. 2016. Being fat and smart: A comparative analysis of the  
717 fat-brain trade-off in mammals. Journal Of Human Evolution 100:25–34.
- 718 Ho L S T, Ané C. 2014. A linear-time algorithm for Gaussian and non-Gaussian trait evolution  
719 models. Systematic Biology 63:397–408.
- 720 Holenweg A-K, and Reyer H-U. 2000. Hibernation behavior of *Rana lessonae* and *R. esculenta*  
721 in their natural habitat. Oecologia 123:41–47.
- 722 Huang Y, Mai C L, Liao W B, Kotschal A. 2020. Body mass variation is negatively associated  
723 with brain size: Evidence for the fat-brain trade-off in anurans. Evolution 74:1551–1557.
- 724 Isler K. 2011. Energetic trade-offs between brain size and offspring production: Marsupials  
725 confirm a general mammalian pattern. BioEssays 33:173–179.
- 726 Isler K, van Schaik C P. 2006. Costs of encephalization: the energy trade-off hypothesis tested  
727 on birds. Journal of Human Evolution 51:228–243.
- 728 Isler K, van Schaik C P. 2009. The expensive brain: A framework for explaining evolutionary  
729 changes in brain size. Journal of Human Evolution 57:392–400.
- 730 Jerison H J. 1973. Evolution of the Brain and Intelligence. Academic Press, New York.
- 731 Jiang Y, Luan X, Liao WB 2023. Anuran brain size predicts food availability-driven population  
732 density. Science China Life Sciences 66:413-415.

- 733 Kardong K V. 2019. *Vertebrates Comparative Anatomy, Function, Evolution*. 8th edition.  
734 McGraw-Hill, New York.
- 735 Kilmer J T, Rodríguez R L. 2017. Ordinary least squares regression is indicated for studies of  
736 allometry. *Journal of Evolutionary Biology* 30:4–12.
- 737 Kotrschal A, Buechel S D, Zala S M, Corral-Lopez A, Penn D J, Kolm N. 2015. Brain size affects  
738 female but not male survival under predation threat. *Ecology Letters* 18:646–652.
- 739 Lefebvre L, Reader S M, Sol D. 2004. Brains, innovations and evolution in birds and primates.  
740 *Brain Behavior and Evolution* 63:233–246.
- 741 Lefebvre L, Whittle P, Lascaris E, Finkelstein A. 1997. Feeding innovations and forebrain size  
742 in birds. *Animal Behaviour* 53:549–560.
- 743 Lemaître J-F, Ramm S A, Barton R A, Stockley P. 2009. Sperm competition and brain size  
744 evolution in mammals. *Journal of Evolutionary Biology* 22:2215–2221.
- 745 Liao W B, Huang Y, Zeng Y, Zhong M J, Luo Y, Lüpold S. 2018. Ejaculate evolution in external  
746 fertilizers: Influenced by sperm competition or sperm limitation? *Evolution* 72:4–17.
- 747 Liao W B, Jiang Y, Li D Y, Jin L, Zhong M J, Qi Y, Lüpold S, Kotrschal A. 2022. Cognition contra  
748 camouflage: how the brain mediates predator-driven crypsis evolution. *Science*  
749 *Advances* 8:eabq1878.
- 750 Lukas W D, Campbell B C. 2000. Evolutionary and ecological aspects of early brain malnutrition  
751 in humans. *Human Nature* 11:1–26.
- 752 Luo Y, Zhong M J, Huang Y, Li F, Liao W B, Kotrschal A. 2017. Seasonality and brain size are  
753 negatively associated in frogs: Evidence for the expensive brain framework. *Scientific*  
754 *Reports* 7:1–9.
- 755 Lüpold S, de Boer R A, Evans J P, Tomkins J L, Fitzpatrick J L. 2020. How sperm competition  
756 shapes the evolution of testes and sperm: A meta-analysis. *Philosophical Transactions*  
757 *of the Royal Society B: Biological Sciences* 375:20200064.



- 758 Lüpold S, Jin L, Liao W B. 2017. Population density and structure drive differential investment in  
759 pre- and postmating sexual traits in frogs. *Evolution* 71:1686–1699.
- 760 Lüpold S, Tomkins J L, Simmons L W, Fitzpatrick J L. 2014. Female monopolization mediates  
761 the relationship between pre- and postcopulatory sexual traits. *Nature Communications*  
762 5:3184.
- 763 Mai C L, Liao W B, Lüpold S, Kotschal A. 2020. Relative brain size is predicted by the intensity  
764 of intrasexual competition in frogs. *American Naturalist* 196:169–179.
- 765 Marchisin A, Anderson J D. 1978. Strategies employed by frogs and toads (Amphibia, Anura) to  
766 avoid predation by snakes (Reptilia, Serpentes). *Journal of Herpetology* 12:151–155.
- 767 Mink J.W, Blumenschine R J, Adams D B. 1981. Ratio of central nervous system to body  
768 metabolism in vertebrates: its constancy and functional basis. *American Journal of*  
769 *Physiology-Regulatory, Integrative and Comparative Physiology* 241:R203–R212.
- 770 Moreno-Rueda G, Requena-Blanco A, Zamora-Camacho F J, Comas M, Pascual G. 2020.  
771 Morphological determinants of jumping performance in the Iberian green frog. *Current*  
772 *Zoology* 66:417–424.
- 773 Muldowney D, Connolly J, Keane M G. 2001. Compositional data analysis in the study of  
774 carcass composition of beef cattle. *Livestock Production Science* 67:241–251.
- 775 Navarrete A, van Schaik C P, Isler K. 2011. Energetics and the evolution of human brain size.  
776 *Nature* 480:91–93.
- 777 Niu Y, Chen Q, Storey K B, Teng L, Li X, Xu T, Zhang H. 2022. Physiological ecology of winter  
778 hibernation by the high-altitude frog *Nanorana parkeri*. *Physiol. Biochem. Zool.* 95:201–  
779 211. The University of Chicago Press.
- 780 Ogielska M, Bartmańska J. 2009. Spermatogenesis and male reproductive system in  
781 Amphibia—Anura. Pp. 34–99 *in* M. Ogielska, ed. *Reproduction of Amphibians*. Science  
782 Publishers, Enfield, NH.

- 783 Pagel M. 1994. Detecting correlated evolution on phylogenies: a general method for the  
784 comparative analysis of discrete characters. *Proceedings of the Royal Society B:*  
785 *Biological Sciences* 255:37–45.
- 786 Pagel M. 1999. Inferring the historical patterns of biological evolution. *Nature* 401:877–884.
- 787 Pinder A W, Storey K B, Ultsch G R. 1992. Estivation and hibernation. Pp. 250–274 *in* M. E.  
788 Feder and W. W. Burggren, eds. *Environmental Physiology of the Amphibians*.  
789 University of Chicago Press, Chicago, IL.
- 790 Pitnick S, Jones K E, Wilkinson G S. 2006. Mating system and brain size in bats. *Proceedings*  
791 *of the Royal Society B: Biological Sciences* 273:719–724.
- 792 Place N J, Veloso C, Visser G H, Kenagy G J. 2002. Energy expenditure and testosterone in  
793 free-living male yellow-pine chipmunks. *Journal of Experimental Zoology* 292:460–467.
- 794 Psenner H. 1957. Neues vom Murmeltier *Marmota marmota*. *Säugetierkd. Mitteilungen* 5:4–10.
- 795 R Core Team. 2022. R: A language and environment for statistical computing. R Foundation for  
796 Statistical Computing, Vienna, Austria.
- 797 Rambaut A, Drummond A J, Xie D, Baele G, Suchard M A. 2018. Posterior summarization in  
798 Bayesian phylogenetics using Tracer 1.7. *Systematic Biology* 67:901–904.
- 799 Reader S M, Laland K N. 2002. Social intelligence, innovation, and enhanced brain size in  
800 primates. *Proceedings of the National Academy of Sciences of the United States of*  
801 *America* 99:4436–4441.
- 802 Revell L J. 2012. phytools: An R package for phylogenetic comparative biology (and other  
803 things). *Methods in Ecology and Evolution* 3:217–223.
- 804 Riddle O. 1909. The rate of digestion in cold-blooded vertebrates. The influence of season and  
805 temperature. *American Journal of Physiology* 24:447–458.
- 806 Ruf, T., and F. Geiser. 2015. Daily torpor and hibernation in birds and mammals. *Biological*  
807 *Reviews* 90:891–926.

- 808 Schliep K P. 2011. phangorn: Phylogenetic analysis in R. *Bioinformatics* 27:592–593.
- 809 Sibly R M. 1981. Strategies of digestion and defecation. Pp. 109–139 in C. R. Townsend and P.  
810 Calow, eds. *Physiological Ecology: An Evolutionary Approach to Resource Use*.  
811 Blackwell Scientific Publications, Oxford, UK.
- 812 Sol D. 2009. The cognitive-buffer hypothesis for the evolution of large brains. P. in R. Dukas  
813 and J. R. Ratcliff, eds. *Cognitive Ecology II*. University of Chicago Press, Chicago, IL.
- 814 Sol D, Duncan R P, Blackburn T M, Cassey P, Lefebvre L. 2005. Big brains, enhanced  
815 cognition, and response of birds to novel environments. *Proceedings of the National*  
816 *Academy of Sciences of the United States of America* 102:5460–5465.
- 817 Staples J F. 2016. Metabolic flexibility: hibernation, torpor, and estivation. *Comprehensive*  
818 *Physiology* 6:737–771.
- 819 Stinner J, Zarlinga N, Orcutt S. 1994. Overwintering behavior of adult bullfrogs, *Rana*  
820 *catesbeiana*, in northeastern Ohio. *Ohio Journal of Science* 94.
- 821 Stoffel M A, Nakagawa S, Schielzeth H. 2017. rptR: repeatability estimation and variance  
822 decomposition by generalized linear mixed-effects models. *Methods Ecology and*  
823 *Evolution* 8:1639–1644.
- 824 Suchard M A, Lemey P, Baele G, Ayres D L, Drummond A J, Rambaut A. 2018. Bayesian  
825 phylogenetic and phylodynamic data integration using BEAST 1.10. *Virus Evolution*  
826 4:vey016.
- 827 Sukhum K V, Freiler M K, Wang R, Carlson B A. 2016. The costs of a big brain: extreme  
828 encephalization results in higher energetic demand and reduced hypoxia tolerance in  
829 weakly electric African fishes. *Proceedings of the Royal Society B: Biological Sciences*  
830 283:20162157.
- 831 Tamura K, Stecher G, Peterson D, Filipski A, Kumar S. 2013. MEGA6: Molecular evolutionary  
832 genetics analysis version 6.0. *Molecular Biology and Evolution* 30:2725–2729.

- 833 Tattersall G J, Ultsch G R. 2008. Physiological ecology of aquatic overwintering in ranid frogs.  
834 Biological Reviews 83:119–140.
- 835 Törnqvist L, Vartia P, Vartia Y O. 1985. How should relative changes be measured? The  
836 American Statistician 39:43–46.
- 837 Vahed K, Parker D J. 2012. The evolution of large testes: Sperm competition or male mating  
838 rate? Ethology 118:107–117.
- 839 van den Boogaart K G, Tolosana-Delgado R. 2013. Analyzing Compositional Data with R.  
840 Springer, Berlin.
- 841 van den Boogaart K G, Tolosana-Delgado R. 2008. “compositions”: A unified R package to  
842 analyze compositional data. Computers & Geosciences 34:320–338.
- 843 van der Bijl, W. 2018. phylopath: Easy phylogenetic path analysis in R. PeerJ 6:e4718.
- 844 van Gelder J J, Olders J H J, Bosch J W G, Starmans P W. 1986. Behaviour and body  
845 temperature of hibernating common toads *Bufo bufo*. Ecography 9:225–228.
- 846 van Woerden J T, van Schaik C P, Isler K. 2010. Effects of seasonality on brain size evolution:  
847 evidence from strepsirrhine primates. American Naturalist 176:758–767.
- 848 van Woerden J T, Willems E P, Van Schaik C P, Isler K. 2012. Large brains buffer energetic  
849 effects of seasonal habitats in catarrhine primates. Evolution 66:191–199.
- 850 von Hardenberg A, Gonzalez-Voyer A. 2013. Disentangling evolutionary cause-effect  
851 relationships with phylogenetic confirmatory path analysis. Evolution 67:378–387.
- 852 Walter H. 1971. Ecology of Tropical and Subtropical Vegetation. Oliver and Boyd, Edinburgh.
- 853 Wells K D. 2007. The Ecology and Behavior of Amphibians. University of Chicago Press,  
854 Chicago, IL.
- 855 Wells K D. 1977. The social behaviour of anuran amphibians. Animal Behavior 25:666–693.
- 856

857 **Figures**

858

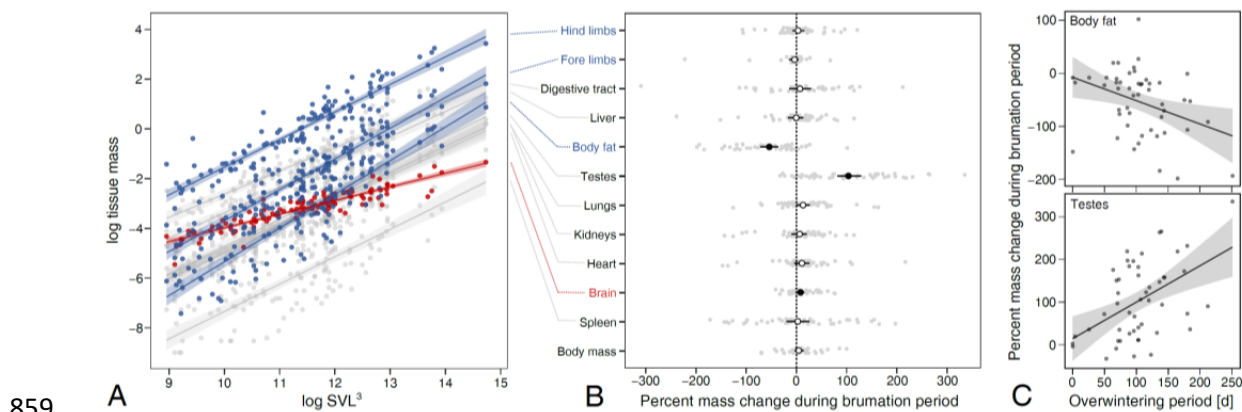

861

862 **Figure 1.** Allometric and seasonal variation in the mass of 11 organs and tissues. **A:** Allometric

863 slopes between the mass of each tissue and cubed snout-vent length (SVL<sup>3</sup>) so that

864 proportionate scaling follows a slope of 1. Each point represents a species-specific mean value

865 in breeding condition ( $N = 116$ ). Relationships deviating from proportionate scaling (based on

866 bootstrapped 95% confidence intervals) are highlighted in blue (steeper than unity) or red

867 (shallower than unity). **B:** Mean percent change with 95% confidence interval for body mass and

868 each individual tissue of 50 anuran species with data from both shortly before and after

869 brumation (= breeding), based on absolute tissue masses between stages and log-transformed

870 to maintain symmetry and additivity (Törnqvist et al. 1985):  $\log(\text{post-brumation} / \text{pre-brumation})$

871  $\times 100$ . The transparent grey dots depict the species-specific values. **C:** The effect of the

872 brumation period on the percent mass change for the two tissues with a substantial seasonal

873 variation (see panel b): body fat (top) and testes (bottom). Each point indicates a species.

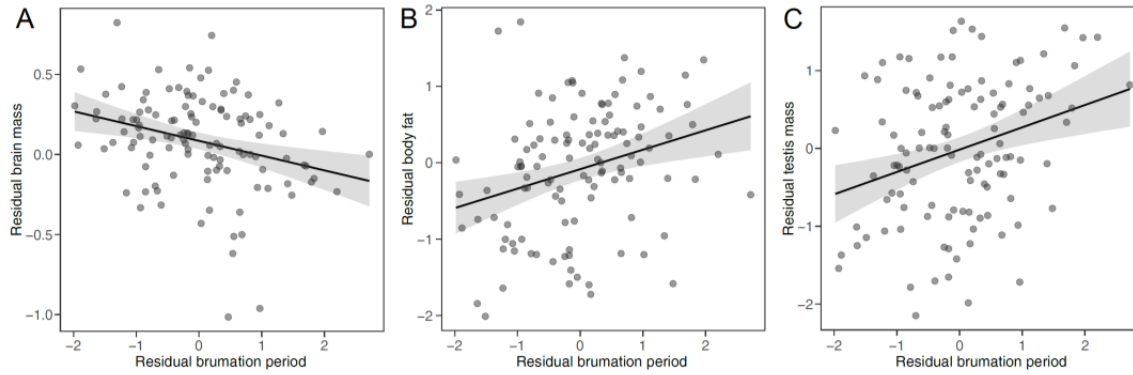

873

874

875 **Figure 2.** Effects of brumation duration on the relative tissue sizes. Relationships between  
876 brumation duration and the relative mass of the brain (**A**), body fat (**B**), and testes (**C**) across  
877 males of 116 anuran species in breeding (post-brumation) condition. All axes are controlled for  
878 the snout-vent length and phylogeny.

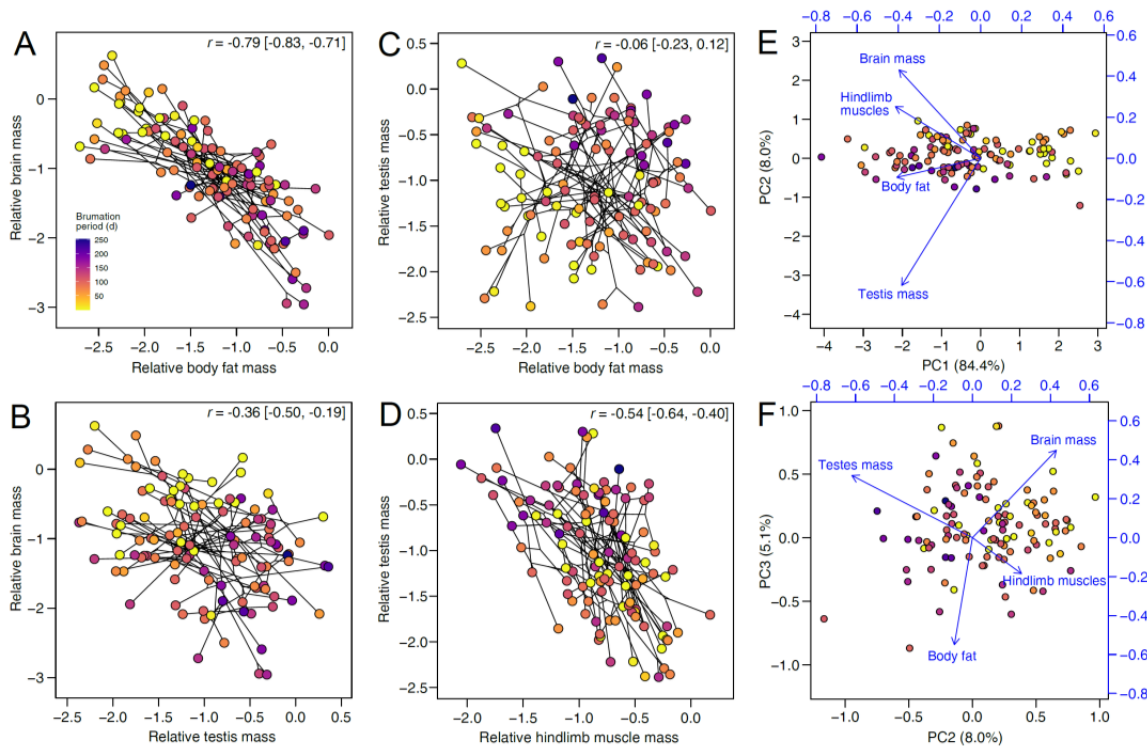

879

880

881 **Figure 3.** Effects of brumation duration on the relative tissue sizes. Panels **A-D** depict the  
882 phylogenetic correlations (shown as phylomorphospace plots (Revell 2012)) between the  
883 relative masses of (**A**) brain and body fat, (**B**) brain and testes, (**C**) testes and body fat, and (**D**)  
884 testes and hindlimb muscles, respectively, across the 116 species (results in Table S14). The  
885 relative tissue masses represent the centered log ratios of the compositional data, and the lines  
886 connect the nodes of the underlying phylogeny, indicating that phenotypic correlations are not  
887 simply the result of phylogenetic clustering. The correlation coefficients and 95% confidence  
888 intervals are indicated. The loadings from a phylogenetic principal component analysis (Revell  
889 2012) on the same variables are also mapped as vectors onto biplots between (**E**) the first and  
890 second or (**F**) the second and third principal components. In all panels, the point colors reflect  
891 the species-specific brumation periods (see legend in panel **A**). Generally, where brumation was

892 relatively shorter or absent, species also tended to have relatively larger brains, less body fat  
893 and smaller testes, respectively, consistent with the univariate analyses (Fig. 2).



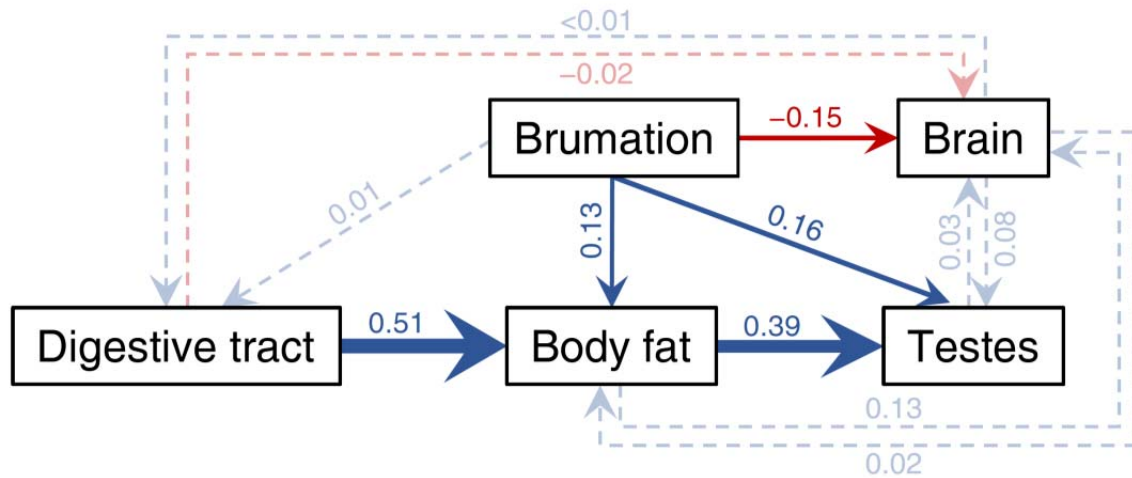

894

895 **Figure 4.** Results of the averaged phylogenetic path model. Visual representation of the  
896 average phylogenetic path model across 116 anuran species. Arrows reflect the direction of the  
897 path, with their widths being proportional to the standardized regression coefficients and colors  
898 indicating the sign (blue = positive, red = negative). Paths with 95% confidence intervals  
899 excluding 0 (i.e., arrows highly probable) are drawn as solid arrows, all others as dashed, semi-  
900 transparent arrows. For simplicity and to avoid over-parameterization, other organs were  
901 omitted in path models as they showed little covariation with brumation duration or brain size. All  
902 phenotypic traits were log-transformed, and all variables were controlled for body size via  
903 additional paths from log SVL. Although SVL had a strong effect on all variables (all  $\beta > 0.37$ ),  
904 its thick blue arrows to each box are omitted in this figure only for visual clarity, but all path  
905 coefficients are presented with their 95%CI in Fig. S7, with further details in Fig. S6 and Table  
906 S16.
